# Supplementary material
Source: Springer Nature journal article supplement (https://www.springermedizin.de/resource/supplementary/13054_2005_3531_MOESM1_ESM.pdf/9720692)

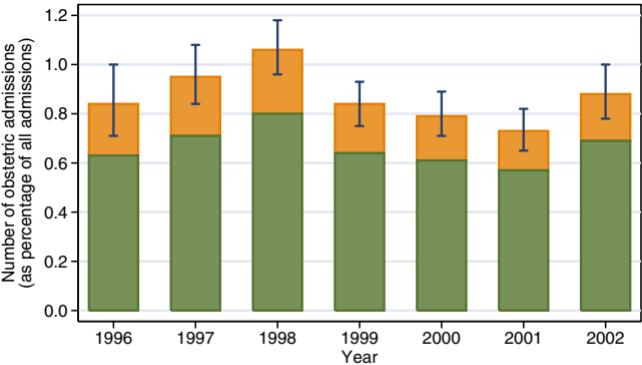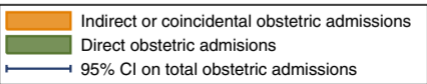

Supplement: MOESM1 [file 9720692]
